# Supplementary material for: Defect-rich walnut-like copper-doped Ni(PO3)2 catalyst towards ammonia borane electrooxidation reaction with high performance
Source: Royal Society of Chemistry journal article supplement (doi:10.1039/d1ta09483a), 2022-01-01
Supplement: d1ta09483a1.pdf [file d1ta09483a1.pdf]

# Defect-Rich Walnut-like Copper-Doped Ni(PO<sub>3</sub>)<sub>2</sub> Catalyst towards Ammonia Borane Electrooxidation Reaction with High Performance

Jia Yu <sup>a</sup>, Haiyan Jing <sup>a</sup>, Peng Zhao <sup>a</sup>, Keren Lu <sup>a</sup>, Juanjuan Song <sup>a</sup>, Zongdeng Wu <sup>a</sup>, Haoxuan Wu<sup>a</sup>, Boyuan Liu <sup>a</sup>, Wu Lei <sup>a\*</sup>, Qingli Hao <sup>a\*</sup>

<sup>a</sup> School of Chemical Engineering, Nanjing University of Science and Technology, Nanjing 210094, China.

E-mail: [qinglihao@njust.edu.cn](mailto:qinglihao@njust.edu.cn) (Q. Hao)

Tel: +86-25-84315190

## S1. Experimental section

The catalysts with different amounts of Cu were synthesized by one-pot hydrothermal method. In brief, 0.12 mmol Cu(NO<sub>3</sub>)<sub>2</sub>•3H<sub>2</sub>O, 1.2 mmol Ni(NO<sub>3</sub>)<sub>2</sub>•6H<sub>2</sub>O, 7.2 mmol urea were dissolved in 60 mL deionized water. The stirred-well solution was transferred to a 100 mL hydrothermal reactor and reacted at 160 °C for 20h. The precursor was collected by centrifugation and washed several times then dried in the vacuum oven at 80 °C overnight. Then, the product named 10% Cu-Ni<sub>2</sub>CO<sub>3</sub>(OH)<sub>2</sub>•H<sub>2</sub>O was annealed in air at 450 °C for 2h to get the metal oxide which was named 10% Cu-NiO. Finally, the oxide was placed in a porcelain boat and located downstream, meanwhile, another porcelain boat containing NaH<sub>2</sub>PO<sub>2</sub> was placed upstream in the same tube (the mass ratio of 10% Cu-NiO and NaH<sub>2</sub>PO<sub>2</sub> is 1:10). Under the nitrogen atmosphere, the tube furnace was heated to 350 °C (1 °C min<sup>-1</sup>, 2 hours), and then cooled down to room temperature. The product was named 10% Cu-Ni(PO<sub>3</sub>)<sub>2</sub>. And other catalysts were synthesized through the same approach above by changing the addition of Cu(NO<sub>3</sub>)<sub>2</sub>•3H<sub>2</sub>O, named Ni(PO<sub>3</sub>)<sub>2</sub>, 5% Cu-Ni(PO<sub>3</sub>)<sub>2</sub> and 20% Cu-Ni(PO<sub>3</sub>)<sub>2</sub>, respectively.

## S2. Characterization

X-ray diffraction (XRD) results were obtained on Bruker D8 Advance with a Cu K $\alpha$  radiation ( $\lambda = 1.5408 \text{ \AA}$ ). Thermal gravimetric analyzer (TGA) data were obtained on Thermo Ecolab 250 at a rate of  $10 \text{ }^\circ\text{C min}^{-1}$  in air. X-ray photoelectron spectroscopy (XPS) was performed on an ESCALAB 250Xi spectrometer using Al K $\alpha$  monochromatic (100W, 30 eV pass energy). And the morphology of the catalysts was characterized by Scanning Electron Microscope (SEM, Quanta 250FEG), Transmission Electron Microscope (TEM, JEOL JEM-2100F), High-resolution TEM (HRTEM), and Energy Dispersive X-ray Spectroscopy (EDS mapping).

## S3. Electrochemical measurements

The electrochemical measurements of ABOR were carried out on RRDE-3A Rotating Ring Disk Electrode Rotator Ver.1.2. The tests were conducted in a three-electrode system by using a rotating disk electrode (RDE,  $\Phi 3\text{mm}$ ), a graphite rod, an Ag/AgCl (saturated KCl) as the working, counter, and reference electrodes, respectively. And all the measurements were performed in N<sub>2</sub>-saturated 0.1 M KOH electrolyte with different amounts of AB at room temperature. 5 mg catalyst (Ni(PO<sub>3</sub>)<sub>2</sub>, 5% Cu-Ni(PO<sub>3</sub>)<sub>2</sub>, 10% Cu-Ni(PO<sub>3</sub>)<sub>2</sub>, or 20% Cu-Ni(PO<sub>3</sub>)<sub>2</sub>) and 0.5mg super P were dispersed in 1 mL aqueous solution (50  $\mu\text{L}$  5 wt% Nafion + 200  $\mu\text{L}$  ethanol + 750  $\mu\text{L}$  DI water) by ultrasonication for 1 hour. Then 5  $\mu\text{L}$  ink was dropped onto the glassy carbon surface of the RDE, which served as the working electrode. The mass loading of the catalyst was  $353 \mu\text{g cm}^{-2}$ .

Cyclic voltammetry (CV) tests were conducted in 0.001 M AB ~ 0.02 M AB + 0.1 M KOH at 1600 rpm with a scan rate of  $10 \text{ mV s}^{-1}$ . Linear sweep voltammetry (LSV) curves were obtained in 2.5 mM AB + 0.1 M KOH at different rotating speeds with a scan rate of  $10 \text{ mV s}^{-1}$ . And the open circuit potential (OCP) of different catalysts were tested in 0.01 M AB + 0.1 M KOH under static conditions. To evaluate the stability of the catalyst, chronoamperometry with multipotential

steps was tested in 0.01 M AB + 0.1 M KOH at -0.3, 0.1, 0.5 and 0.1 V vs. RHE with a rotating speed of 1600 rpm. All the potential values in this work were converted to vs. RHE scale by Nernst equation:  $E_{RHE} = E_{Ag/AgCl} + 0.0591pH + 0.197$ . The number transferred electron ( $n$ ) was calculated by the following equations:

Levich equation:

$$i_{l,a} = 0.62nFAD_R^{2/3}\omega^{1/2}\nu^{-1/6}C_R^* \quad (S1)$$

where  $i_{l,a}$  is the limiting anodic current at a given rotating rate,  $F$  is Faraday constant,  $A$  is the electrode area ( $\text{cm}^2$ ),  $D_R$  is the diffusion coefficient ( $8.45 \times 10^{-6} \text{ cm}^2 \text{ s}^{-1}$  for AB),  $\omega$  is the electrode rotating rate ( $\text{rad s}^{-1}$ ),  $\nu$  is the kinematic solution viscosity ( $1.216 \times 10^{-2} \text{ cm}^2 \text{ s}^{-1}$  for AB), and  $C_R^*$  is the bulk concentration of the reduced species ( $\text{mol cm}^{-3}$ ).

Koutecký-Levich (K-L) equation:

$$1/i = 1/i_k + 1/i_{l,a} = 1/i_k + 1/0.62nFAD_R^{2/3}\omega^{1/2}\nu^{-1/6}C_R^* \quad (S2)$$

where  $i$  is the disk current,  $i_k$  is the kinetically limited current.

CV was tested at the range of -0.4~0 V vs. RHE to avoid the oxidation of H<sub>2</sub> above 0 V in a same three-electrode system by using a rotating disk electrode, a graphite rod, an Ag/AgCl (saturated KCl) as the working, counter, and reference electrodes, respectively. After 500 CV cycles in N<sub>2</sub>-saturated 0.1 M KOH or 0.1 M KOH + 0.1 M AB at 10 mV s<sup>-1</sup>, 1 mL gas above the cell was sampled by gas-tight syringe and monitored by gas chromatograph (GC). And the gas product from 0.1 M KOH + 0.1 M AB without catalyst which was static for 6h was also monitored by GC.

#### S4. Computational methods

Spin-polarized density functional theory (DFT) computations were performed using the Vienna ab initio simulation package (VASP) with the projected augmented wave method. The exchange-correlation function was described by the parameterization scheme of Perdew-Burke-Ernzerhof of the generalized gradient approximation. The exchange-correlation function was described by the parameterization scheme of Perdew-Burke-Ernzerhof of the generalized gradient approximation. The vacuum layer is set to 20 Å to avoid interactions between the periodically repeated structures along the z direction. The Grimme DFT-D3 scheme of dispersion correction with zero damping is adopted to account for the vdW interactions. We calculated and analyzed the d-band center of the (010) plane in Cu-Ni(PO<sub>3</sub>)<sub>2</sub> with a unit cell parameter change of 0.6%. The adsorption energy of AB and BO<sub>2</sub><sup>-</sup> on the surface of Cu-Ni(PO<sub>3</sub>)<sub>2</sub> and Ni(PO<sub>3</sub>)<sub>2</sub> was also calculated on (010) plane.

## S5. Supplementary data

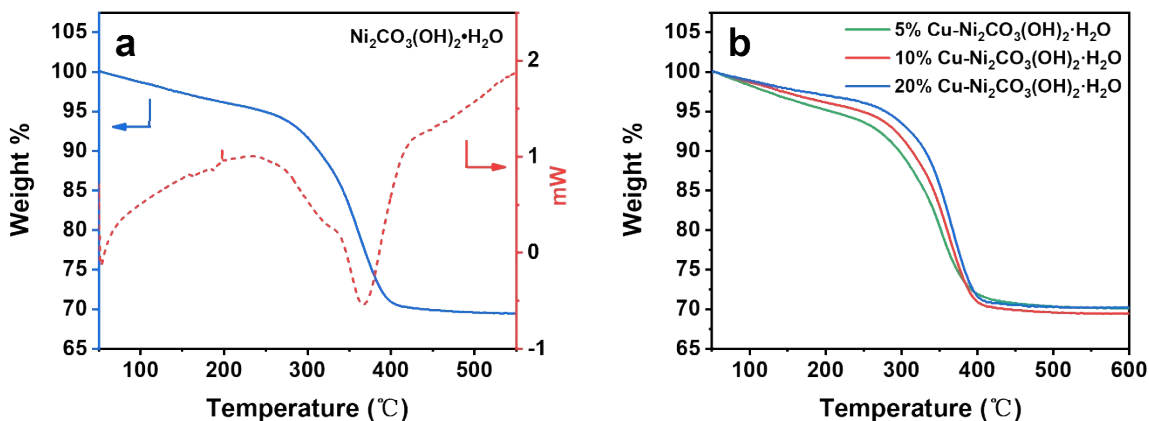

Fig. S1. (a) TGA and DSC curves of Ni<sub>2</sub>CO<sub>3</sub>(OH)<sub>2</sub>·H<sub>2</sub>O. (b) TGA curves of 5%, 10%, 20% Cu-doped Ni<sub>2</sub>CO<sub>3</sub>(OH)<sub>2</sub>·H<sub>2</sub>O.

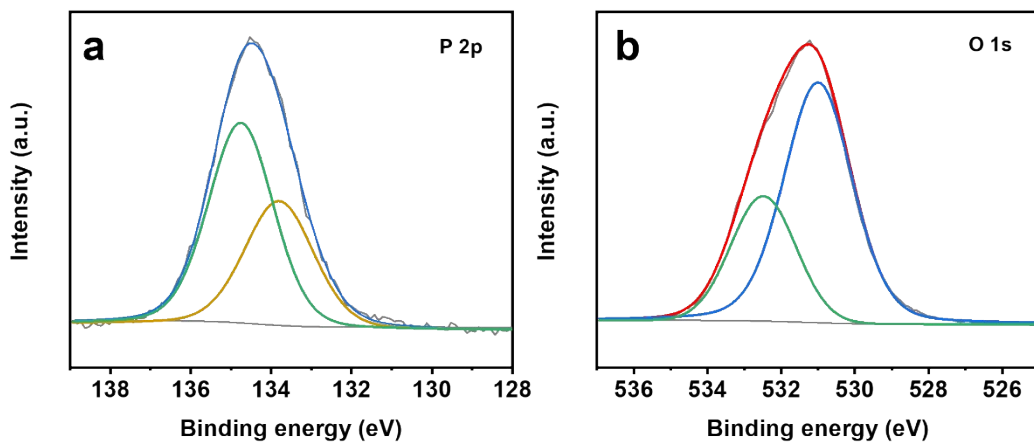

Fig. S2. High-resolution XPS spectrums of (a) O 1s and (b) P 2p of Ni(PO<sub>3</sub>)<sub>2</sub>.

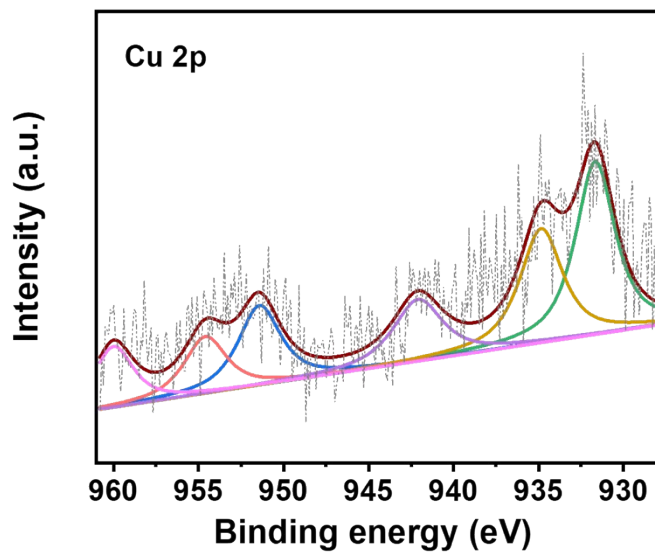

Fig. S3. High-resolution XPS spectrum of Cu 2p of 10% Cu-Ni(PO<sub>3</sub>)<sub>2</sub>.

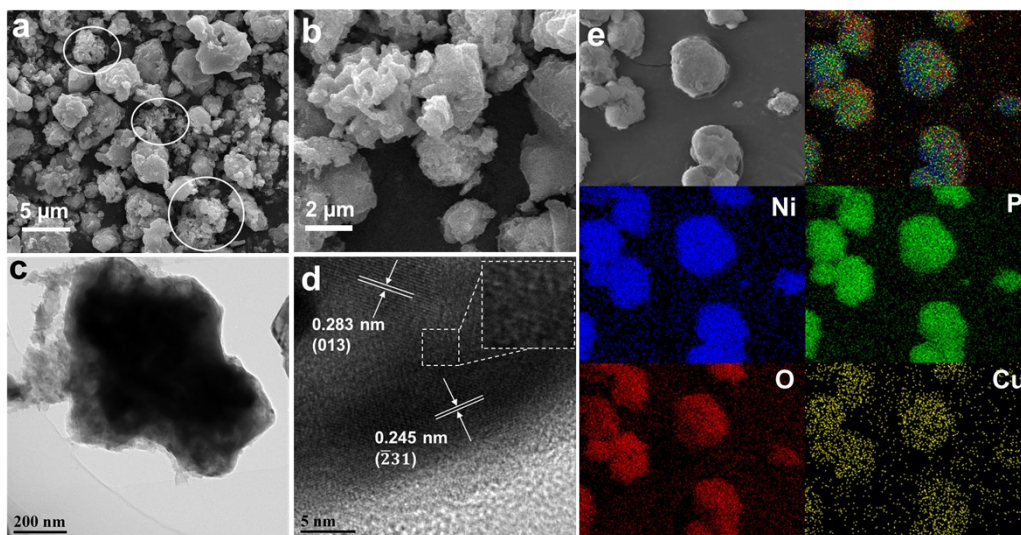

Figure S4. (a, b) SEM, (c) TEM, (d) HRTEM images and (e) corresponding EDS mapping images of 10% Cu-Ni(PO<sub>3</sub>)<sub>2</sub> catalyst after stability test.

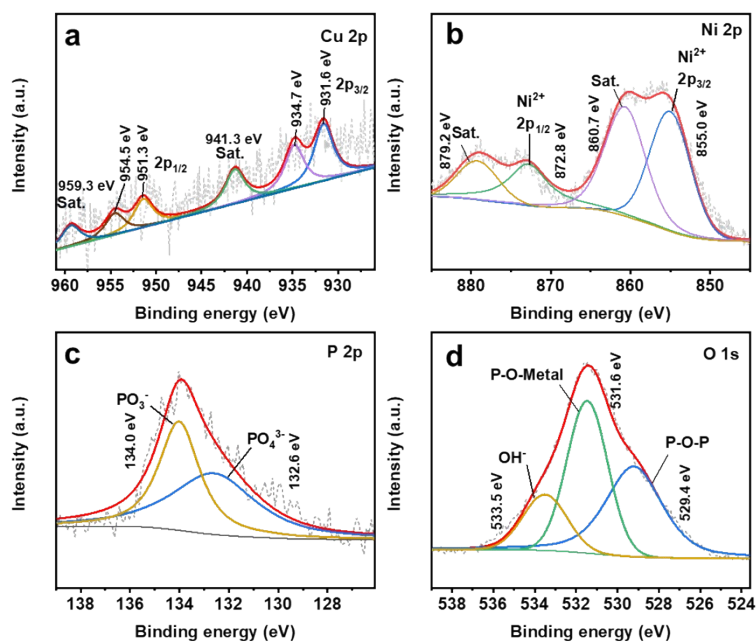

Figure S5. High-resolution XPS spectra of (a) Cu 2p, (b) Ni 2p, (c) P 2p and (d) O 1s in 10% Cu-Ni(PO<sub>3</sub>)<sub>2</sub> after stability test.

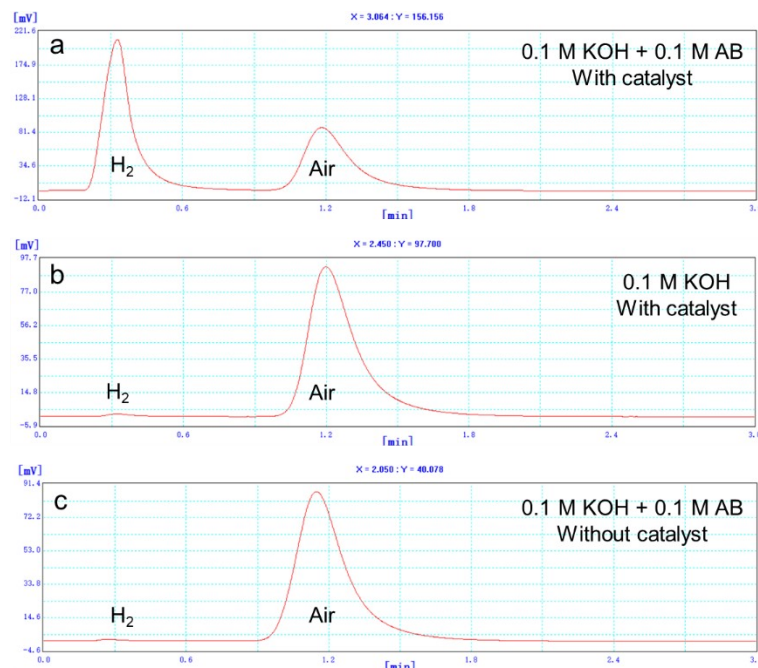

Figure S6. Gas chromatograms of the gas products of (a) 0.1 M KOH + 0.1 M AB, (b) 0.1 M KOH with catalyst, and (c) 0.1 M KOH + 0.1 M AB without catalyst.

Table S1. Comparison of electrocatalytic parameters of 10% Cu-Ni(PO<sub>3</sub>)<sub>2</sub> catalyst and other electrocatalysts reported in the literature for ABOR.

| Samples                                                | E <sub>onset</sub><br>(V vs. RHE) | Current density<br>(mA cm <sup>-2</sup> ) | Electrolyte<br>solution | Scan rate<br>(mV s <sup>-1</sup> ) | Ref.           |
|--------------------------------------------------------|-----------------------------------|-------------------------------------------|-------------------------|------------------------------------|----------------|
| 10% Cu-Ni(PO <sub>3</sub> ) <sub>2</sub>               | -0.282                            | 7.07 (at 0.298 V)                         | 0.01 M AB+<br>0.1 M KOH | 10                                 | This<br>work   |
| Ni <sub>1-x</sub> Cu <sub>x</sub> O/CFP                | -0.267                            | 4.65 (at 0.3 V)                           | 0.01 M AB+<br>0.1 M KOH | 10                                 | 1 <sup>1</sup> |
| Ni <sub>1-x</sub> Cu <sub>x</sub> Se <sub>2</sub> /CFP | -0.148                            | 7.05 (at 0.3 V)                           | 0.01 M AB+<br>0.1 M KOH | 10                                 | 2 <sup>2</sup> |
| Ni <sub>1-x</sub> Fe <sub>x</sub> Se <sub>2</sub> /CFP | -0.071                            | 6.90 (at 0.3 V)                           | 0.01 M AB+<br>0.1 M KOH | 10                                 | 2 <sup>2</sup> |
| Ni <sub>1-x</sub> Co <sub>x</sub> Se <sub>2</sub> /CFP | 0.041                             | 6.80 (at 0.3 V)                           | 0.01 M AB+<br>0.1 M KOH | 10                                 | 2 <sup>2</sup> |
| Au-Ag/PAP/GCE                                          | -0.147                            | 0.54 (at 0.5 V)                           | 1 mM AB+<br>2 M NaOH    | 50                                 | 3 <sup>3</sup> |
| BNPs <sup>s*</sup>                                     | -0.195                            | 17.3 (at 0.5 V)                           | 5 mM AB+<br>0.1 M NaOH  | 10                                 | 4 <sup>4</sup> |
| Pd/C                                                   | -0.200                            | 7.5 (at 0.5 V)                            | 5 mM AB+<br>0.1 M NaOH  | 10<br>(1600 rpm)                   | 5 <sup>5</sup> |
| Pt/C                                                   | -0.030                            | 7.5 (at 0.5 V)                            | 5 mM AB+<br>0.1 M NaOH  | 10<br>(1600 rpm)                   | 5 <sup>5</sup> |

|                      |        |                 |                          |                  |                |
|----------------------|--------|-----------------|--------------------------|------------------|----------------|
| Ni <sub>3</sub> Co/C | -0.090 | 5 (at 0.3 V)    | 5 mM AB+<br>0.1 M NaOH   | 10<br>(1600 rpm) | 6 <sup>6</sup> |
| Ni <sub>3</sub> Ag/C | -0.050 | 6.3 (at 0.5 V)  | 5 mM AB+<br>0.1 M NaOH   | 10<br>(1600 rpm) | 6 <sup>6</sup> |
| Ni <sub>3</sub> Pd/C | -0.030 | 10 (at 0.5 V)   | 5 mM AB+<br>0.1 M NaOH   | 10<br>(1600 rpm) | 6 <sup>6</sup> |
| Pt/C                 | -0.060 | 30 (at 0.669 V) | 0.01 M AB+<br>0.1 M NaOH | 25<br>(1000 rpm) | 7 <sup>7</sup> |
| Pd/C                 | -0.275 | 30 (at 0.641 V) | 0.01 M AB+<br>0.1 M NaOH | 25<br>(1000 rpm) | 7 <sup>7</sup> |

The potential value corresponds to the oxidation current density and is expressed on the RHE scale.

\* The abbreviation of bimodal nano porous Ag.

Table S2. The calculated lattice parameters for Cu-Ni(PO<sub>3</sub>)<sub>2</sub>.

| Scale factor | Lattice parameters |       |
|--------------|--------------------|-------|
|              | a (Å)              | b (Å) |
| 0.998        | 9.80               | 11.05 |
| 1.004        | 9.86               | 11.12 |

## S6. References

1. C. Wu, J. Zhu, H. Wang, G. Wang, T. Chen and Y. Tan, *ACS Catal.*, 2019, **10**, 721-735.
2. G. Wang, H. Wang, T. Chen and Y. Tan, *J. Mate. Chem. A*, 2019, **7**, 16372-16386.
3. Ş. U. Karabiberoglu, Ç. C. Koçak, S. Koçak and Z. Dursun, *Nano-Micro Lett.*, 2016, **8**, 358-370.
4. J. Luo, P. Han, Z. Dan, F. Qin, T. Tang and Y. Dong, *Microporous Mesoporous Mater.*, 2020, **308**.
5. A. Zadick, J.-F. Petit, V. Martin, L. Dubau, U. B. Demirci, C. Geantet and M. Chatenet, *ACS Catal.*, 2018, **8**, 3150-3163.
6. A. Zadick, L. Dubau, K. Artyushkova, A. Serov, P. Atanassov and M. Chatenet, *Nano Energy*, 2017, **37**, 248-259.
7. P.-Y. Olu, F. Deschamps, G. Caldarella, M. Chatenet and N. Job, *J. Power Sources*, 2015, **297**, 492-503.
